# Supplementary material for: Structural polymorphism and substrate promiscuity of a ribosome-associated molecular chaperone
Source: Copernicus journal article supplement (doi:10.5194/mr-2021-9), 2021-01-25
Supplement: Supplementary file 1 [file mr-2021-9-supplement.pdf]

Supplement

## **Structural polymorphism and substrate promiscuity of a ribosome-associated molecular chaperone**

Chih-Ting Huang<sup>1</sup>, Yei-Chen Lai<sup>2</sup>, Szu-Yun Chen<sup>1</sup>, Meng-Ru Ho<sup>1</sup>, Yun-Wei Chiang<sup>2</sup>, Shang-Te Danny Hsu<sup>1,3,\*</sup>

1. Institute of Biological Chemistry, Academia Sinica, Taipei 11529, Taiwan

2. Department of Chemistry, National Tsing Hua University, Hsichu 30013, Taiwan

3. Institute of Biochemical Sciences, National Taiwan University, Taipei 106, Taiwan

*Correspondence to: Shang-Te Danny Hsu (sthsu@gate.sinica.edu.tw)*

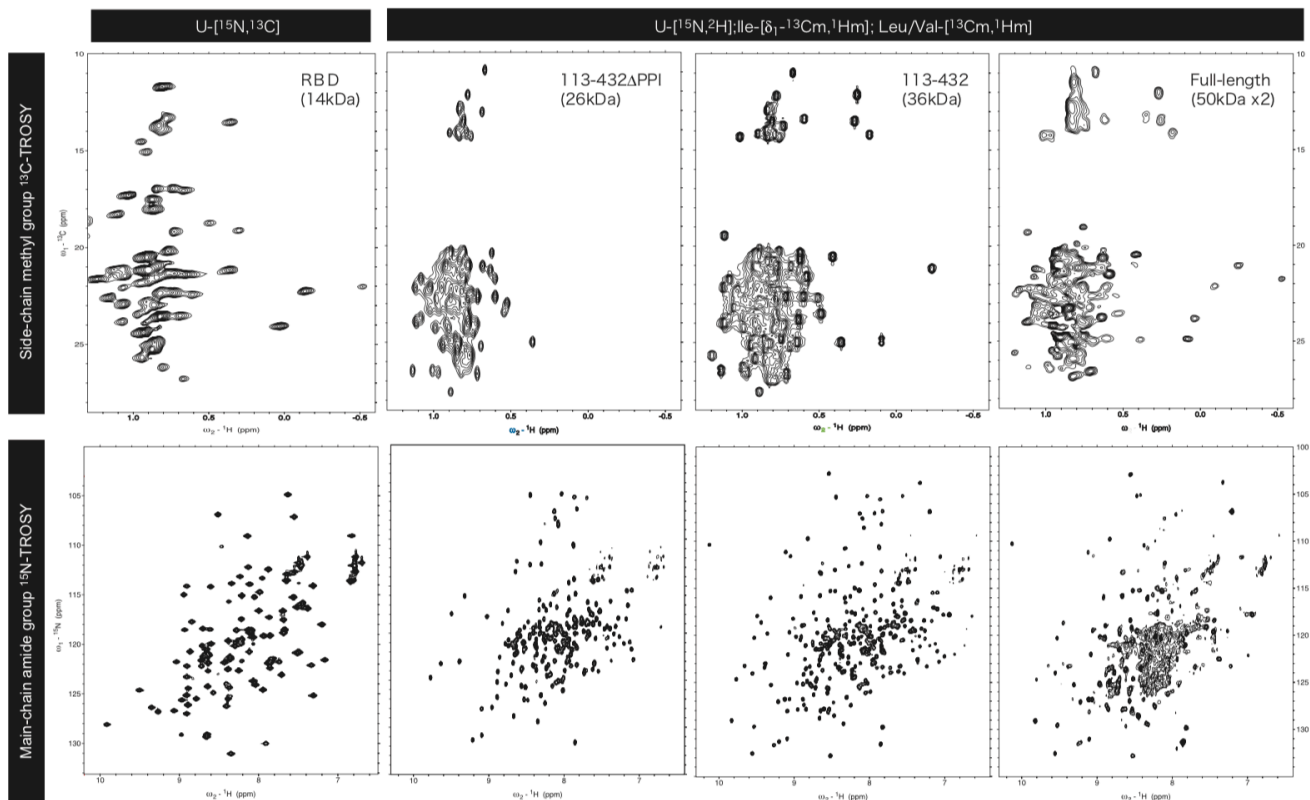

Figure S1. Divide-and-conquer strategy for NMR assignments of TF. The side-chain methyl  $^{13}\text{C}$ - $^1\text{H}$  correlation spectra are shown on the top panels. The backbone amide  $^{15}\text{N}$ - $^1\text{H}$  correlation spectra are shown on the bottom panels. Except for RBD, which was not deuterated and selectively methyl-labeled, all other constructs, namely SBD (113-432 $\Delta$ PPI), TF113-432 and full-length TF were perdeuterated and selectively protonated and  $^{13}\text{C}$  labeled in the methyl groups of isoleucine  $\delta 1$ , leucine, and valine.

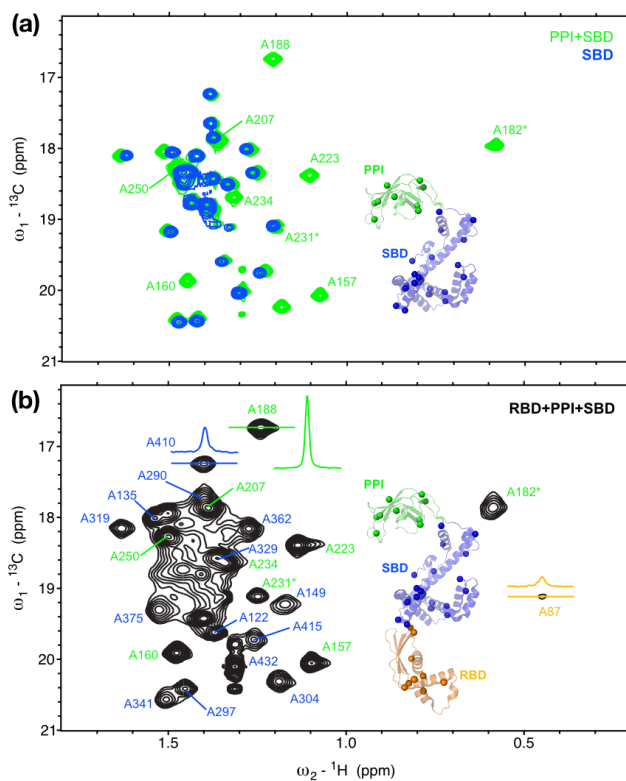

Figure S2. Alanine methyl NMR spectral analyses of TF variants. (a) Superposition of the methyl  $^{13}\text{C}$ - $^1\text{H}$  correlation spectra of SBD (blue) and TF<sub>113-432</sub> (green) with selected crosspeaks originated from PPI labeled with their residue identities. (b) Methyl  $^{13}\text{C}$ - $^1\text{H}$  correlation spectra of full-length TF with resolved crosspeaks labeled with the corresponding residue identities. The proton lineshapes of selected resonances are shown for RBD, PPI and SBD as indicated by the horizontal lines. Insets: cartoon representations of TF<sub>113-432</sub> (a) and full-length TF (b) with RBD, PPI and SBD colored in orange, green and blue, respectively. The C $\beta$  atoms of the selectively protonated and  $^{13}\text{C}$  labeled alanine side-chains are shown in spheres. All constructs were perdeuterated with selective protonation and  $^{13}\text{C}$  labeling at the alanine C $\beta$  positions.
